# Supplementary material for: Laparoscopic versus open mesohepatectomy for patients with centrally located hepatocellular carcinoma: a propensity score matched analysis
Source: Springer Nature journal article supplement (doi:10.1007/s00464-018-6593-2), 2018-11-29
Supplement: MOESM1 [file 16304412]

| Supplementary Table 1. Univariable analysis of prognostic factors for overall survival and disease-free survival. | | |
| --- | --- | --- |
|  | Overall survival | Disease-free survival |
| Sex (M vs. F) | 1.1 (0.5, 2.1) 0.884 | 1.7 (0.9, 3.1) 0.110 |
| Age (≥ 60 vs. < 60 years) | 0.5 (0.3, 1.0) 0.038 | 0.8 (0.5, 1.2) 0.275 |
| ICG-R15 % (≥ 10% vs. < 10%) | 2.3 (0.6, 8.4) 0.219 | 0.9 (0.3, 2.5) 0.815 |
| Platelet (109/L) | 1.0 (1.0, 1.0) 0.719 | 1.0 (0.9, 1.0) 0.106 |
| ALBI | 2.1 (1.2, 3.4) 0.005 | 1.8 (1.2, 2.6) 0.005 |
| Prothrombin time (s) | 1.2 (1.0, 1.5) 0.015 | 1.0 (1.0, 1.0) 0.960 |
| AFP (≥ 400 vs. < 400 ng/ml) | 2.5 (1.5, 4.0) <0.001 | 1.6 (1.1, 2.3) 0.020 |
| HBsAg (P vs. N) | 2.6 (1.0, 6.4) 0.044 | 2.3 (1.2, 4.4) 0.011 |
| HBV-DNA (≥ 1000 vs. < 1000 copies/mL) | 1.8 (1.1, 3.1) 0.027 | 1.4 (1.0, 2.1) 0.083 |
| Tumor size (cm) | 1.2 (1.1, 1.3) <0.001 | 1.1 (1.1, 1.2) <0.001 |
| Tumor number (single vs. multiple) | 0.6 (0.4, 1.0) 0.068 | 0.6 (0.4, 0.8) 0.004 |
| Classification |  |  |
| Type II vs. type I | 2.1 (1.1, 4.2) 0.032 | 1.9 (1.1, 3.2) 0.015 |
| Type III vs. type I | 1.2 (0.6, 2.4) 0.645 | 0.9 (0.6, 1.6) 0.820 |
| Type IV vs. type I | 2.4 (1.2, 5.0) 0.019 | 2.8 (1.6, 4.6) <0.001 |
| AJCC7 T-stage |  |  |
| T2 vs. T1 | 3.1 (1.6, 6.1) 0.001 | 2.2 (1.2, 3.9) 0.007 |
| T3 vs. T1 | 5.4 (2.6, 11.3) <0.001 | 4.7 (2.6, 8.4) <0.001 |
| Surgical methods (LH vs. OH) | 0.6 (0.2, 1.7) 0.374 | 0.5 (0.2, 1.1) 0.083 |
| Major vascular tumor thrombus (yes vs. no) | 4.7 (2.3, 9.6) <0.001 | 4.4 (2.5, 7.9) <0.001 |
| Blood loss (≥ 800 vs. < 800 ml) | 1.5 (0.7, 3.1) 0.271 | 2.0 (1.2, 3.3) 0.009 |
| Blood transfusion (yes vs. no) | 2.2 (1.1, 4.5) 0.034 | 2.3 (1.3, 3.9) 0.003 |
| Duration of vascular exclusion (min) | 1.0 (1.0, 1.0) 0.582 | 1.0 (1.0, 1.0) 0.983 |
| MVI (yes vs. no) | 2.9 (1.7, 4.9) <0.001 | 4.4 (2.9, 6.6) <0.001 |
| Encapsulation (nonencapsulated vs. encapsulated) | 1.0 (0.5, 2.1) 0.906 | 1.3 (0.8, 2.2) 0.253 |
| Differentiation (high vs. moderate/low) | 0.8 (0.1, 5.5) 0.783 | 0.4 (0.1, 1.7) 0.213 |
| Data was presented as HR (95%CI) P-value. M, male; F, female; ICG-R15, indocyanine green retention rate at 15 min; ALBI, albumin-bilirubin; AFP, alpha fetoprotein; P, positive; N, negative; HBV, hepatitis B virus; LH, laparoscopic hepatectomy; OH, open hepatectomy; MVI, microvascular invasion. | | |

| Supplementary Table 2. Clinical features of the 128 patients after propensity score matching. | | | |
| --- | --- | --- | --- |
|  | OH (n = 96) | LH (n = 32) | P-value |
| Sex (female/male) | 14/82 | 3/29 | 0.559 |
| Age (years) | 53.1 ± 12.8 | 53.5 ± 11.7 | 0.868 |
| ICG-R15 (%) | 5.5 ± 3.2 | 5.8 ± 4.0 | 0.774 |
| Preoperative ALT (IU/L) | 46.4 ± 46.5 | 43.9 ± 23.1 | 0.773 |
| Preoperative AST (IU/L) | 38.6 ± 21.7 | 41.7 ± 18.7 | 0.469 |
| Preoperative total bilirubin (umol/L) | 14.9 ± 6.5 | 16.4 ± 6.5 | 0.257 |
| Preoperative albumin (g/L) | 42.0 ± 3.8 | 41.7 ± 4.1 | 0.712 |
| ALBI (grade 1/2/3) | 55/41/0 | 16/15/1 | 0.282 |
| Preoperative platelet (109/L) | 129.0 ± 59.0 | 125.2 ± 48.2 | 0.742 |
| Preoperative prothrombin time (s) | 12.4 ± 1.1 | 12.3 ± 1.1 | 0.762 |
| AFP (ng/ml) | 288.9 (1.4-4235.0) | 379.5 (1.0-1210.0) | 0.373 |
| HBsAg (P/N) | 261/45 | 31/10 | 0.111 |
| HBV-DNA (copies/mL) |  |  | 0.114 |
| <1000 | 44 (50.0%) | 10 (33.3%) |  |
| ≥1000 | 44 (50.0%) | 20 (66.7%) |  |
| Tumor size (cm) | 4.6 ± 1.9 | 4.5 ± 1.9 | 0.958 |
| Tumor number (single/multiple) | 88/8 | 28/4 | 0.493 |
| Classification (I/II/III/IV) | 30/2/61/3 | 5/2/25/0 | 0.202 |
| T-stage (T1/T2/T3) | 95/0/1 | 32/0/0 | 0.564 |
| Major vascular tumor thrombus (no/PV) | 94/1 | 32/0 | 1.000 |
| MVI (no/yes) | 70/8 | 26/6 | 0.227 |
| Tumor encapsulation |  |  | 0.567 |
| Encapsulated | 68 (70.8%) | 25 (78.1%) |  |
| Nonencapsulated | 28 (29.2%) | 7 (21.9%) |  |
| Differentiation (high/moderate/low) | 14/63/19 | 7/16/9 | 0.295 |
| Data are shown as mean ± SD or median (range) or n (%). OH, open hepatectomy; LH, laparoscopic hepatectomy; ICG-R15, indocyanine green retention rate at 15 min; ALT, alanine aminotransferase; AST, aspartate aminotransferase; ALBI, albumin-bilirubin; AFP, alpha fetoprotein; HBV, hepatitis B virus; PV, portal vein; MVI, microvascular invasion. Y, Yes; N, No. | | | |

| Supplementary Table 3. Surgical procedures and operation related parameters. | | | |
| --- | --- | --- | --- |
|  | OH (n = 96) | LH (n = 32) | P-value |
| Resected segments | V+IVb:VIII+IVa:V+VIII: IVa+IVb:IV+V+VIII±I=21:2:19:19:35 | V+IVb:VIII+IVa:V+VIII: IVa+IVb:IV+V+VIII=5:1:6:7:13 | 0.706 |
| Anatomic resection (yes/no) | 78/18 | 26/6 | 1.000 |
| Duration of operation (min) | 171.0 ± 34.2 | 173.6 ± 61.8 | 0.775 |
| Intraoperative blood loss (ml) | 294.3 ± 247.9 | 375.0 ± 355.0 | 0.179 |
| Duration of vascular exclusion (min) | 30.2 ± 16.0 | 44.6 ± 19.3 | 0.006 |
| Intraoperative transfusion (no/yes) | 82/2 | 30/2 | 0.305 |
| Transfusion volume (ml) | 22.0 (0.0-1450.0) | 53.1 (0.0-1200.0) | 0.310 |
| Postoperative peak ALT (IU/L) | 461.4 ± 441.4 | 405.8 ± 377.1 | 0.524 |
| Postoperative peak AST (IU/L) | 408.1 ± 455.8 | 409.6 ± 504.7 | 0.987 |
| Postoperative peak PT (s) | 14.4 ± 2.1 | 13.9 ± 1.8 | 0.233 |
| Postoperative peak TB (umol/L) | 35.4 ± 18.2 | 44.7 ± 40.5 | 0.078 |
| Postoperative hospital stay (day) | 11.7 ± 3.9 | 9.5 ± 2.2 | 0.004 |
| Postoperative morbidity (no/yes) | 70/26 | 29/3 | 0.026 |
| 90-day mortality (no/yes) | 96/0 | 32/0 | / |
| Data are shown as mean ± SD or n. OH, open hepatectomy; LH, laparoscopic hepatectomy; ALT, alanine aminotransferase; AST, aspartate aminotransferase; PT, prothrombin time; TB, total bilirubin. | | | |
|
